# Supplementary material
Source: publisher figshare collection journal article supplement (https://gsapubs.figshare.com/ndownloader/files/23312795)
Supplement: Supplementary file 1 [file 23312795]

## DRI Appendix 1 Field Setting

This study examines the morphology, stratigraphy and evolution of Tutaga island, located on the southwest, leeward rim of Funafuti Atoll (Figure 1). Funafuti is one of nine low-lying atolls and reef platforms of the Tuvalu archipelago, situated in the central Pacific Ocean ( $8^{\circ} 32.195'S$ ,  $179^{\circ} 6.776'E$ ; DRI Fig. 1). Approximately 25 km long and 18 km wide Funafuti has an atoll reef perimeter of  $\sim 71$  km, which encloses a 40-50 m deep lagoon that covers an area of  $\sim 205$  km<sup>2</sup>. In contrast, Funafuti has a small total land area of  $<300$  ha, consisting of 33 islands distributed unevenly around the atoll, that occupies only 8 % of the surrounding reef platform. Despite variations in size and shape most islands are built of coralline sands and/or gravel derived from the adjacent reef and lagoon and are of mid- to late-Holocene age (McLean and Hosking, 1992, Fig. 1A). A number of islands however have a core of large individual *Porites* coral heads and boulders. Such islands are limited to the southwest reef rim of the atoll and include the islands of Avalau Tenguasu, Tefala and Tutaga the last being the focus of this investigation (Fig. 1).

Funafuti atoll is situated in the trade wind zone, experiencing prevailing easterly winds and waves with a significant offshore wave height ( $H_o$ ) of 1.3 m (maximum wave height  $H_{max} \sim 2.3$  m), significant wave period ( $T_s$ ) of 11 s, and peak direction ( $D_p$ ) of  $114^{\circ}$  (Bosserele et al., 2015). The western margin of the atoll, where Tutaga is located, is the leeward rim with monthly  $H_o$  values of 0.2-0.4 m ( $T_s \sim 8-12$  s) and  $H_{max}$  of 1.0 m ( $T = 6$  s) (Bosserele et al., 2015). While located outside the primary zone of cyclogenesis, Funafuti is infrequently impacted by cyclone events that generate wave heights between 3 – 4+ m, with anecdotal reports of waves of 1.5-3.0 m propagating across island surfaces (Fitchett, 1981; Maragos et al., 1973). The leeward aspect of the atoll can also be impacted by cyclones that move past the western side to the atoll. A most recent example was Tropical Cyclone Pam that impacted the atoll in 2015.

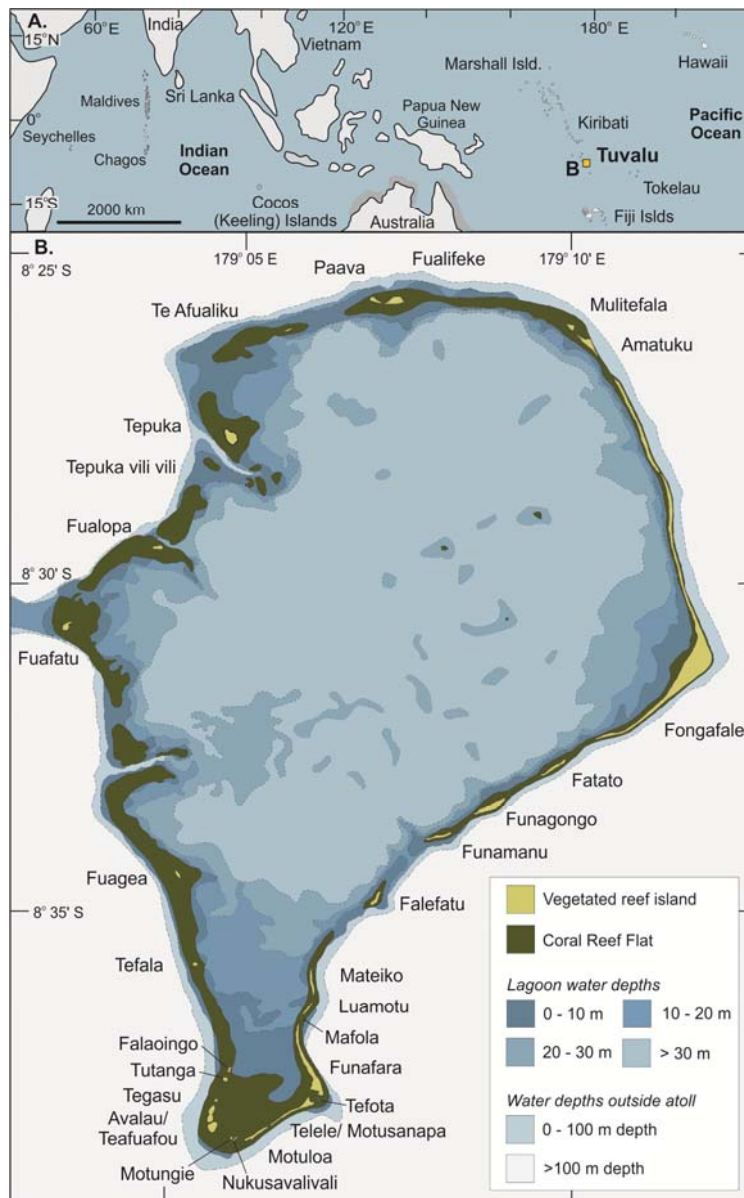

**DRI Figure 1.** The location of the Tuvalu archipelago, South Pacific Ocean (A) and location of Tutaga on the southwest rim of Funafuti atoll (B).

## References

- Bosserelle, C., Reddy, S., Lal, D., 2015. Tuvalu, Funafuti Wave buoy, in: Bosserelle, C. (Ed.), WACOP wave climate reports. Secretariat of the Pacific Community, Suva, Fiji Islands.
- Fitchett, K., 1987, Physical effects of hurricane Bebe upon Funafuti atoll, Tuvalu: Australian Geographer, v. 18, p. 1-7.
- McLean, R.F., and Hosking, P.L. 1991, Geomorphology of reef islands and atoll motu in Tuvalu: South Pacific Journal of Natural Science, v. 11, p. 167-189.
- Maragos, J., Baines, G.B.K., Beveridge, P.J. 1973, Tropical cyclone Bebe creates new land formation on Funafuti atoll, Science, v. 181, p. 1161-1164, doi:10.1126/science.181.4105.1161.

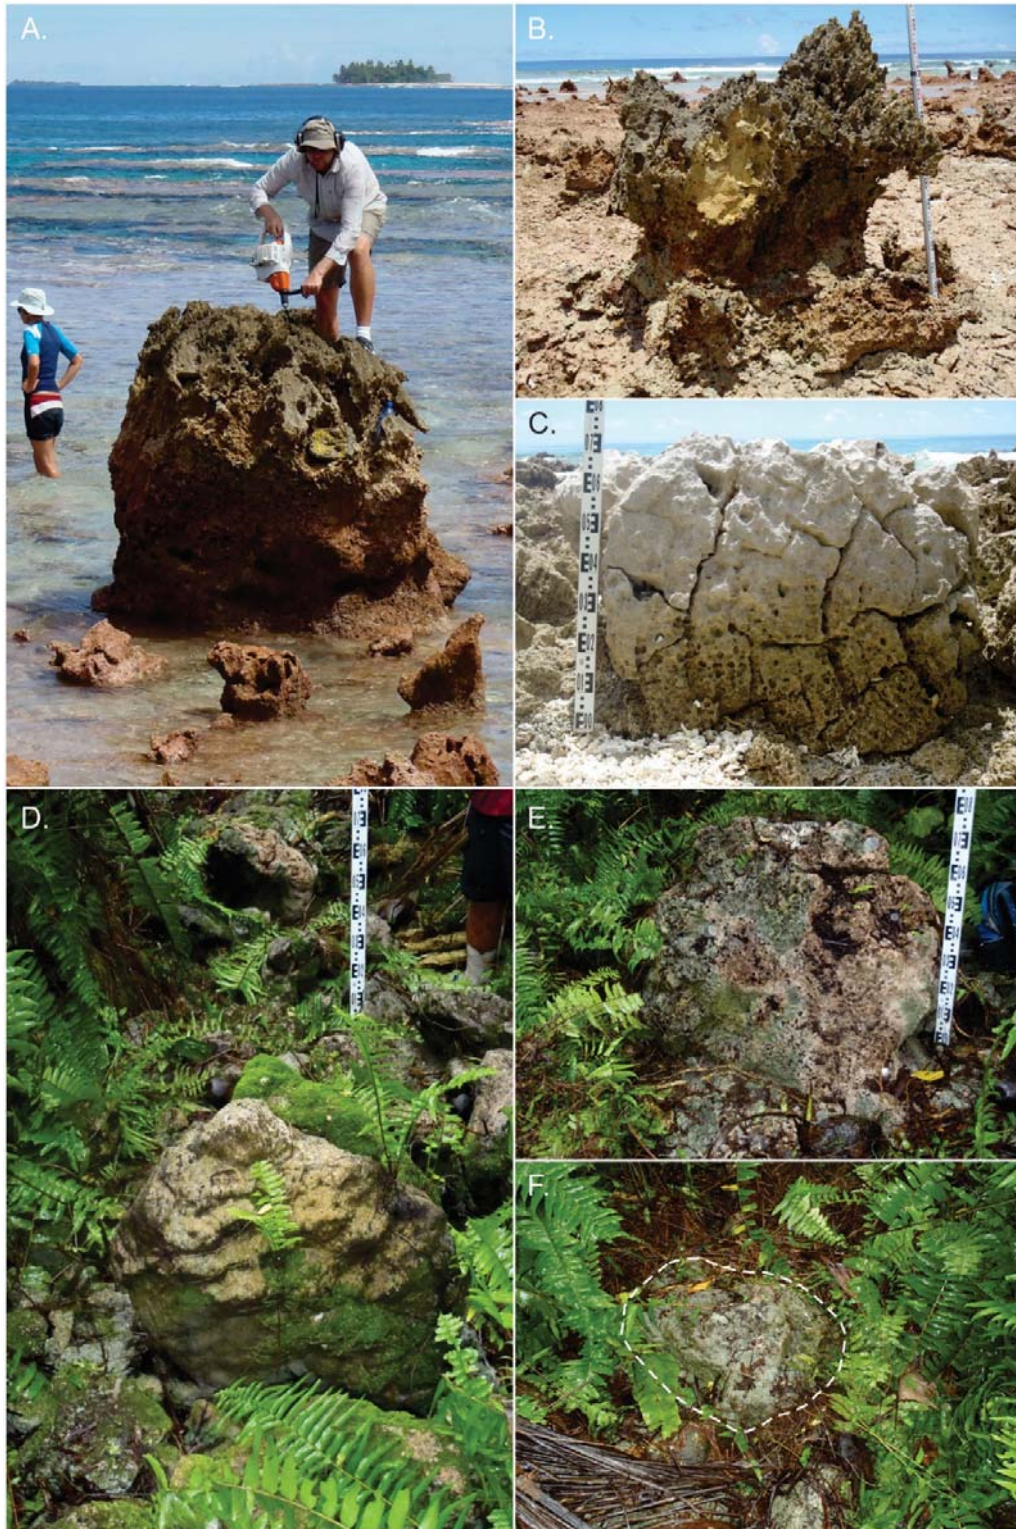

**DRI Figure 2.** Fossil coral storm blocks across the Tutaga reef flat and island surface. A) Coral B1 on outer reef flat transect, B) weathered Merulinid coral mid reef flat, C) Fossil coral with weathered growth rings showing coral not in growth position. D) Storm deposited coral boulders on the mid-island surface. E) Large storm deposited boulder. Fossil Porites coral outcropping at island surface in leeward section of island (Sample I96).

**Table DRI 1.** Summary of physical characteristics of coral blocks, and estimate of coral growth period, Tutaga reef flat, Funafuti atoll, Tuvalu.

| Distance from reef edge (m) | Block No. | Height (m) | Width (m) | Depth (m) | <sup>a</sup> Block vol. (m <sup>3</sup> ) | <sup>b</sup> Cylinder vol. (m <sup>3</sup> ) | <sup>c</sup> Coral growth age (yrs) |
|-----------------------------|-----------|------------|-----------|-----------|-------------------------------------------|----------------------------------------------|-------------------------------------|
| 0-20                        | 1         | 2.2        | 2.2       | 2.6       | 12.58                                     | 9.88                                         | 173                                 |
|                             | 4         | 1.85       | 1.8       | 1.65      | 5.49                                      | 4.32                                         | 123                                 |
|                             | 5         | 1.48       | 1.62      | 1.1       | 2.64                                      | 2.12                                         | 108                                 |
| 20-40                       | 2         | 1.12       | 1.2       | 1.75      | 2.35                                      | 1.85                                         | 117                                 |
|                             | 6         | 1.55       | 2.7       | 2.45      | 10.25                                     | 8.48                                         | 180                                 |
|                             | 16        | 1.28       | 2.1       | 1.95      | 5.24                                      | 4.30                                         | 130                                 |
| 40-60                       | 3         | 1.47       | 2.66      | 1.75      | 6.84                                      | 5.41                                         | 177                                 |
|                             | 7         | 1.1        | 3.6       | 2.78      | 11.01                                     | 10.64                                        | 240                                 |
|                             | 14        | 0.46       | 1.0       | 0.95      | 0.44                                      | 0.39                                         | 67                                  |
|                             | 15        | 0.78       | 2.15      | 2.1       | 3.52                                      | 3.50                                         | 143                                 |
|                             | 17        | 0.88       | 2.15      | 2.2       | 4.16                                      | 3.96                                         | 147                                 |
|                             | 18        | 0.98       | 2.12      | 1.8       | 3.74                                      | 3.22                                         | 141                                 |
|                             | 19        | 1.04       | 1.55      | 1.52      | 2.45                                      | 1.99                                         | 103                                 |
|                             | 20        | 0.88       | 1.39      | 1.77      | 2.17                                      | 1.79                                         | 118                                 |
|                             | 8         | 1.04       | 3.2       | 2.04      | 6.79                                      | 5.96                                         | 213                                 |
|                             | 31        | 0.75       | 1.15      | 1.54      | 1.33                                      | 1.09                                         | 103                                 |
| 60-80                       | 32        | 0.68       | 1.2       | 0.96      | 0.78                                      | 0.63                                         | 80                                  |
|                             | 36        | 0.77       | 0.92      | 1.48      | 1.05                                      | 0.83                                         | 99                                  |
|                             | 38        | 0.87       | 1.42      | 1.47      | 1.82                                      | 1.51                                         | 98                                  |
|                             | 39        | 0.82       | 1.28      | 1.08      | 1.13                                      | 0.91                                         | 85                                  |
|                             | 10        | 1.05       | 1.68      | 1.48      | 2.61                                      | 2.11                                         | 112                                 |
|                             | 11        | 1.3        | 2.05      | 2.2       | 5.86                                      | 4.85                                         | 147                                 |
|                             | 12        | 1.2        | 2.45      | 1.5       | 4.41                                      | 3.51                                         | 163                                 |
|                             | 13        | 1.25       | 2.1       | 3.05      | 8.01                                      | 6.72                                         | 203                                 |
|                             | 24        | 1.08       | 1.9       | 1.64      | 3.37                                      | 2.76                                         | 127                                 |
|                             | 25        | 1.0        | 1.37      | 1.65      | 2.26                                      | 1.82                                         | 110                                 |
| 80-100                      | 26        | 0.6        | 1.05      | 1.0       | 0.63                                      | 0.53                                         | 70                                  |
|                             | 28        | 0.58       | 2.3       | 1.95      | 2.60                                      | 2.89                                         | 153                                 |
|                             | 29        | 0.66       | 1.76      | 0.98      | 1.14                                      | 0.93                                         | 117                                 |
|                             | 30        | 0.84       | 1.38      | 1.24      | 1.44                                      | 1.17                                         | 92                                  |
|                             | 33        | 0.86       | 1.1       | 0.98      | 0.93                                      | 0.73                                         | 73                                  |
|                             | 35        | 1.07       | 1.25      | 1.08      | 1.44                                      | 1.13                                         | 83                                  |
|                             | 34        | 0.93       | 1.52      | 1.24      | 1.75                                      | 1.40                                         | 101                                 |
|                             | 37        | 1.09       | 2.37      | 1.38      | 3.56                                      | 2.84                                         | 158                                 |
|                             | 9         | 1.48       | 1.75      | 1.58      | 4.09                                      | 3.22                                         | 117                                 |
|                             | 40        | 0.56       | 1.62      | 3.15      | 2.86                                      | 2.94                                         | 210                                 |
| 120-140                     | 23        | 0.54       | 1.1       | 1.56      | 0.93                                      | 0.82                                         | 104                                 |
| 140-160                     | 41        | 0.6        | 1.4       | 1.1       | 0.92                                      | 0.79                                         | 93                                  |
|                             | 42        | 0.56       | 0.83      | 0.86      | 0.40                                      | 0.33                                         | 57                                  |
|                             | 21        | 1.05       | 1.53      | 2.0       | 3.21                                      | 2.61                                         | 133                                 |
|                             | 22        | 0.65       | 1.3       | 1.15      | 0.97                                      | 0.83                                         | 87                                  |

<sup>a</sup>Block volume calculated based on three axis dimensions. <sup>c</sup>Block volume based on approximation to a cylinder.

<sup>c</sup>Coral growth age is calculated from the longest axis divided by 1.5 cm/year (the average extension rate for massive *Porites* bommies). Note the average age for the complete data set (n=41) is 126 years; for the reef flat corals (ie from 0-80 m) the average age is 131 years and for the island 80-160 m (119 years).



**Table DRI 2.** Radiocarbon ages from coral blocks and island materials, Tutaga Funafuti Atoll, Tuvalu

| Lab code | <sup>a</sup> Island sample location | Sample material                 | Conventional age (yr B.P.) | Calibrated age range (95.4% probability) (cal. yr B.P.) | Mid point of calibrated age range (cal. yr B.P.) |
|----------|-------------------------------------|---------------------------------|----------------------------|---------------------------------------------------------|--------------------------------------------------|
| Wk-41300 | TUT B1                              | <i>Porites</i> coral block      | 1,550 ± 32                 | 991-1,212                                               | 1,102                                            |
| Wk-41294 | TEF B1                              | <i>Porites</i> coral block      | 1,519 ± 29                 | 966-1,166                                               | 1,066                                            |
| Wk-41304 | TUT B18                             | <i>Porites</i> coral block      | 1,460 ± 27                 | 915-1,098                                               | 1,007                                            |
| Wk-41301 | TUT B4                              | <i>Porites</i> coral block      | 1,320 ± 30                 | 761-937                                                 | 849                                              |
| Wk-41310 | TUT I28                             | <i>Porites</i> coral Isld block | 1,233 ± 26                 | 685-871                                                 | 778                                              |
| Wk-41306 | TUT B28                             | <i>Porites</i> coral block      | 1,216 ± 27                 | 669-850                                                 | 760                                              |
| Wk-41305 | TUT B21                             | <i>Porites</i> coral block      | 1,200 ± 29                 | 658-827                                                 | 743                                              |
| Wk-41296 | TEF B35                             | <i>Porites</i> coral block      | 1,192 ± 19                 | 661-792                                                 | 727                                              |
| Wk-41303 | TUT B15                             | <i>Porites</i> coral block      | 1,212 ± 27                 | 666-846                                                 | 726                                              |
| Wk-41302 | TUT B8                              | <i>Porites</i> coral block      | 1,151 ± 27                 | 637-765                                                 | 701                                              |
| Wk-41308 | TUT B34                             | <i>Porites</i> coral block      | 1,130 ± 29                 | 621-754                                                 | 688                                              |
| Wk-41307 | TUT B32                             | <i>Porites</i> coral block      | 1,055 ± 27                 | 544-672                                                 | 608                                              |
| Wk-41295 | TEF B2                              | <i>Porites</i> coral block      | 1,072 ± 24                 | 553-685                                                 | 619                                              |
| Wk-41313 | TUT I95                             | <i>Porites</i> coral Isld block | 1,037 ± 23                 | 539-659                                                 | 599                                              |
| Wk-41312 | TUT I86                             | <i>Porites</i> coral Isld block | 984 ± 27                   | 510-634                                                 | 572                                              |
| Wk-41297 | TEF B40                             | <i>Porites</i> coral block      | 824 ± 29                   | 367-518                                                 | 443                                              |
| Wk-41311 | TUT I58                             | <i>Porites</i> coral Isld block | 757 ± 26                   | 304-467                                                 | 386                                              |
| Wk-41309 | TUT I22                             | <i>Porites</i> coral Isld block | 736 ± 22                   | 295-449                                                 | 372                                              |
| Wk-41299 | TUT I96                             | Coral gravel clast              | 726 ± 20                   | 290-438                                                 | 364                                              |
| Wk-41298 | TEF B71                             | <i>Porites</i> coral block      | 693 ± 30                   | 265-425                                                 | 345                                              |

<sup>a</sup> TUT = Tutaga reef flat coral blocks, TEF = adjacent Tefala reef flat coral blocks used to augment the reef flat chronology, B = coral block, I = island block or gravel sample. <sup>b</sup>Four age groupings are inferred suggestive of periods of storm activity: (1) 1102 to 1007 yr BP (n=3, x=1058); (2) 778 to 688 yr BP (n=7, x=732); (3) 619 to 572 yr BP (n=4, x=600) and; (4) 386 to 345 yr BP (n=4, x=367). Note: Radiocarbon dates obtained from the Radiocarbon Dating Laboratory, University of Waikato (Wk), New Zealand. Ages calibrated using OxCal version 4.2.4 (Bronk Ramsey, 2013) with marine data set (Reimer et al., 2013) and Delta-R of 6 ± 21 as best estimate for Tuvalu.

### Notes on Coral Sampling and Sample Preparation

Samples from the coral blocks were retrieved either by drill core or geological hammer. Careful attention was paid to finding the coral growth bands and orientation of corallites in order to identify the most recent living block surface prior storm transport and polyp death. However, we cannot guarantee that that objective was achieved in all cases. Drill cores of 3.5 cm diameter and length ranging from 15 to 30cm together with 10 x 5 x 5 cm geological hammer samples (10x5x5 cm in size) were sliced to remove the surface layer of cyanobacteria and filamentous algae and inspected for any inclusions of sediment (which was removed) and obvious recrystallization of the original aragonite skeleton to calcite. Samples were forwarded to the University of Waikato Radiocarbon Dating Laboratory for radiometric (liquid scintillation spectrometry) dating.

Samples were pre-treated as marine shell samples and etched with dilute HCL to minimize the possibility contamination through isotopic exchange and all aragonite shell samples are tested for recrystallization prior to dating to ensure no chemical alteration has taken place. Further details on pre-treatment and operating procedures are available at the University of Waikato Radiocarbon Dating Laboratory at:

<https://www.radiocarbon dating.com/operating-procedures/radiometric-dating>

## **References**

- Bronk Ramsey, C., 2013, Development of the radiocarbon program OxCal: Radiocarbon, v. 43, p. 355–363.
- Reimer, P. J., Bard, E., Bayliss, A., et al., 2013. IntCal13 and marine 13 radiocarbon age calibration curves 0-50,000 year cal BP: Radiocarbon, v.55, no.4, 1869-1887.
